# Supplementary material
Source: ML conference proceedings conference paper supplement (https://openreview.net/forum?id=hRY0ytSnM0)

⊕ cLUT    ■ NumPy    ▲ JAX    ● PyTorch

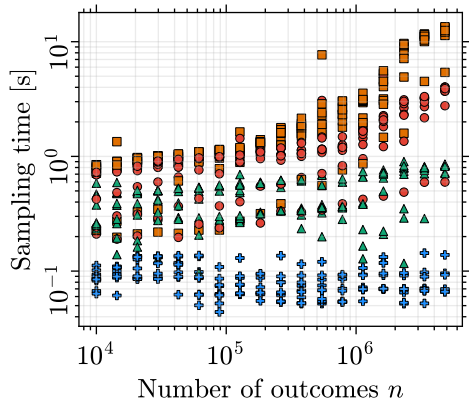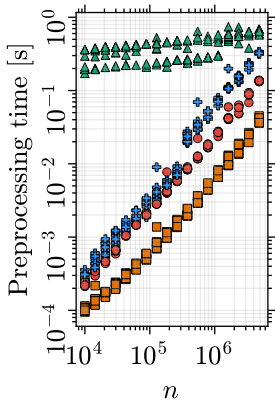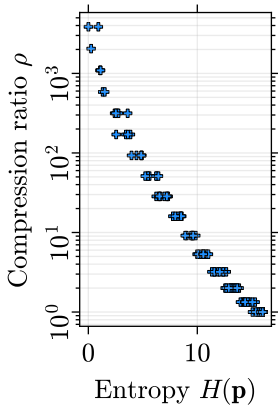

Supplement: supplementary_material [file pdf_python_combined.pdf › lut_benchmark/figures/pdf/pdf_python_combined.pdf]
